# Supplementary material
Source: publisher figshare collection journal article supplement (https://acs.figshare.com/ndownloader/files/27302748)
Supplement: Supplementary file 1 [file 27302748]

## Supporting Information

### **Path Ensembles for Pin1-catalyzed Cis-trans Isomerization of a Substrate Calculated by Weighted Ensemble Simulations**

Kei Moritsugu<sup>1</sup>, Norifumi Yamamoto<sup>2</sup>, Yasushige Yonezawa<sup>3</sup>, Shin-ichi Tate<sup>4</sup>, and Hiroshi Fujisaki<sup>5,6\*</sup>

<sup>1</sup>Graduate School of Medical Life Science, Yokohama City University, 1-7-29 Suehirocho, Tsurumi, Yokohama 230-0045, Japan

<sup>2</sup>Department of Applied Chemistry, Faculty of Engineering, Chiba Institute of Technology, 2-17-1 Tsudanuma, Narashino, Chiba 275-0016, Japan

<sup>3</sup>High Pressure Protein Research Center, Institute of Advanced Technology, Kindai University, Kinokawa, Wakayama 649-6493, Japan

<sup>4</sup>Department of Mathematical and Life Sciences, School of Science, Hiroshima University, 1-3-1 Kagamiyama, Higashi-Hiroshima 739-8526, Japan

<sup>5</sup>Department of Physics, Nippon Medical School, 1-7-1 Kyonan-cho, Musashino, Tokyo 180-0023, Japan

<sup>6</sup>AMED-CREST, Japan Agency for Medical Research and Development, Japan

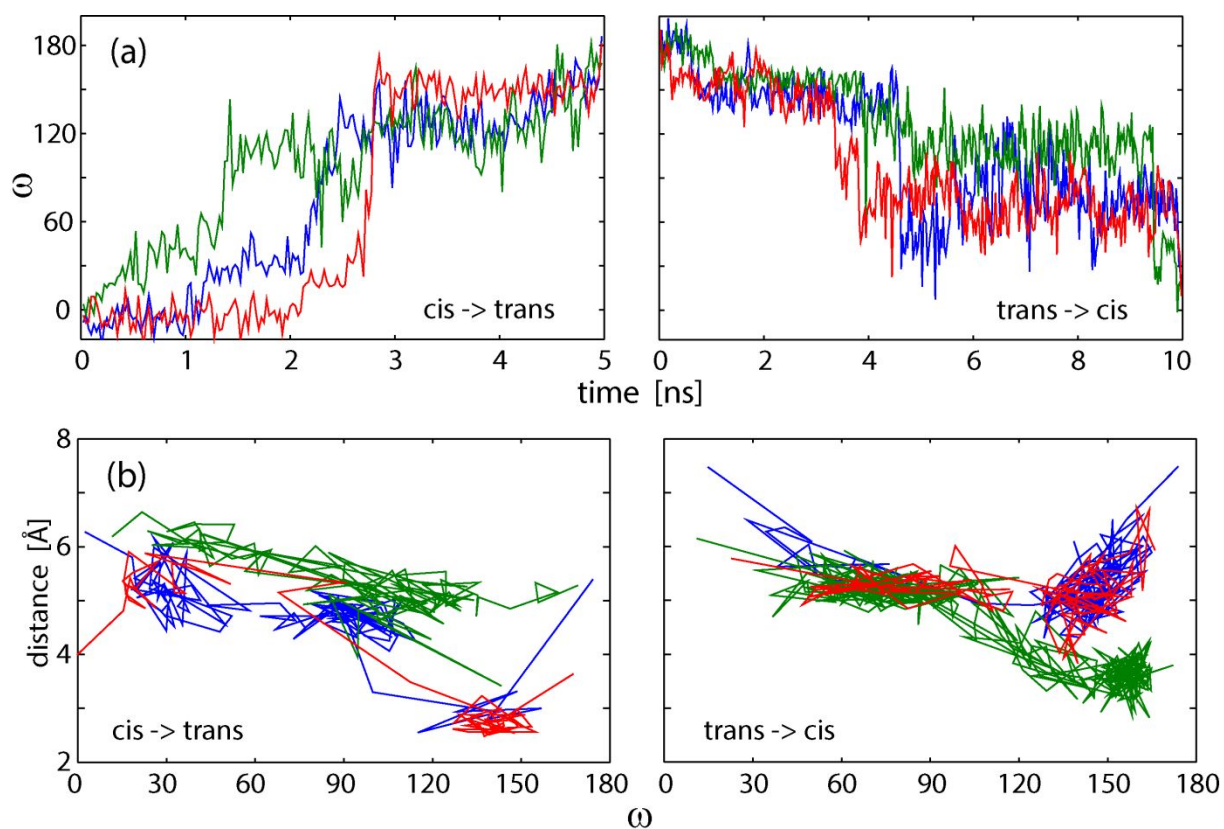

**Figure S1.**

Three representative paths obtained from the WE simulations of both cis  $\rightarrow$  trans (left) and trans  $\rightarrow$  cis (right). (a)  $\omega$  as a function of the simulation time, and (b) two-dimensional plots along  $\omega$  and the atom distance between Ser154O $_{\gamma}$  and pSerO of the substrate (see Fig. 4a).

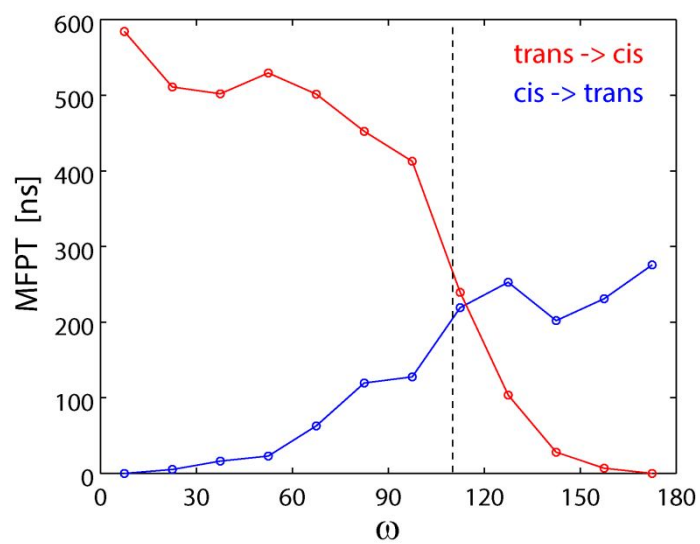

**Figure S2.**

Mean free passage time (MFPT) as a function of  $\omega$ , calculated from the WE simulations of both cis  $\rightarrow$  trans (blue) and trans  $\rightarrow$  cis (red).
